# Supplementary material
Source: HighWire-hosted journal article supplement (https://qualitysafety.bmj.com/content/32/9/503)

## Appendix

**Appendix Figure 1: Bootstrapping analytical workflow, exemplar patient race**

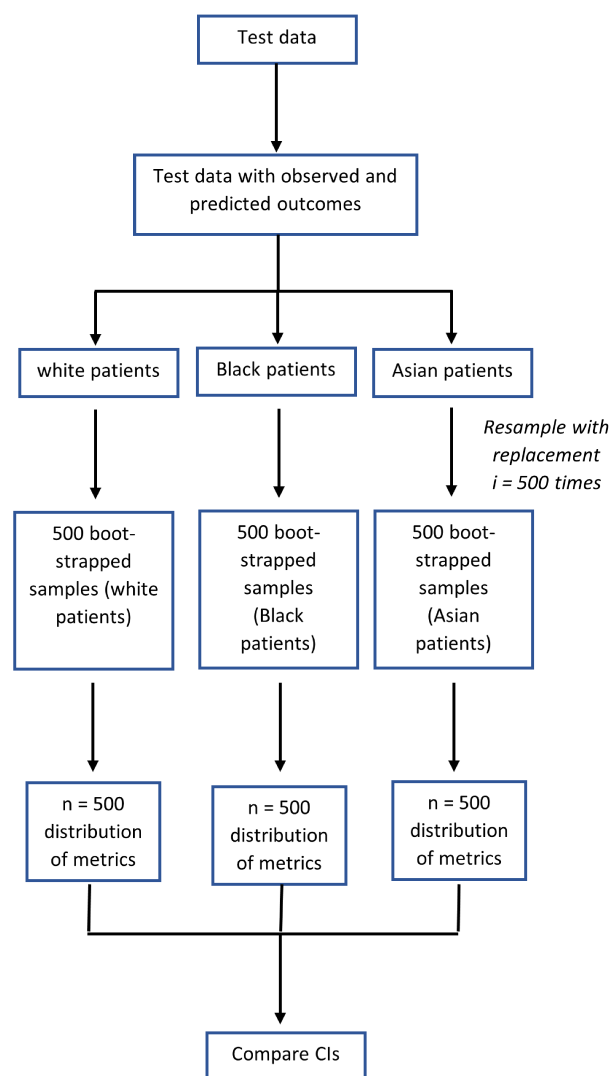

CI = Confidence interval.

**Appendix Table 1: Predictors and coefficients included in the Palliative Connect mortality prediction model**

|                      | Predictors                      | Coefficients |
|----------------------|---------------------------------|--------------|
|                      | (Intercept)                     | -4.09        |
|                      | Age                             | 0.70         |
|                      | Female                          | -0.22        |
|                      | Admission type urgent           | 1.29         |
| <i>Comorbidities</i> | Metastatic cancer               | 0.23         |
|                      | Alcohol use disorder            | -0.08        |
|                      | Weight loss                     | 0.14         |
|                      | Deficiency anemia               | -0.10        |
|                      | Lymphoma                        | 0.17         |
|                      | Pulmonary circulation disorders | 0.06         |
|                      | Obesity                         | -0.08        |
|                      | Hypertension, uncomplicated     | -0.16        |
|                      | Fluid and electrolyte disorders | 0.10         |
|                      | Renal failure                   | -0.06        |
|                      | Other neurologic disorders      | 0.06         |
|                      | Peripheral vascular disorders   | 0.04         |
|                      | Hypothyroidism                  | -0.04        |
|                      | Congestive heart failure        | 0.14         |
|                      | Depression                      | -0.07        |
|                      | Drug use disorder               | -0.10        |
|                      | Coagulopathy                    | 0.10         |
|                      | Solid tumor without metastasis  | 0.32         |
| <i>Lab values</i>    | Anion gap                       | 0.23         |
|                      | Blood urea nitrogen             | 0.33         |
|                      | Total calcium                   | 0.44         |
|                      | Carbon dioxide                  | 0.49         |
|                      | Chloride                        | 0.23         |
|                      | Creatinine                      | 0.36         |
|                      | Glucose                         | 0.13         |
|                      | Hemoglobin                      | 0.18         |
|                      | Mean cell volume                | 0.15         |
|                      | Platelet                        | 0.62         |
|                      | Potassium                       | 0.23         |
|                      | Red cell distribution width     | 0.11         |
|                      | Sodium                          | 0.45         |
|                      | White blood cell                | 0.49         |

**Appendix Table 2: Model predictive performance for each patient subgroup, threshold for triggered palliative care consultation set at predicted probability of 6 month mortality = 0.3**

|                               |                               | accuracy |        |                | FPR    |                | FNR    |                | Brier  |                | C-statistic |                | ICI    |                |
|-------------------------------|-------------------------------|----------|--------|----------------|--------|----------------|--------|----------------|--------|----------------|-------------|----------------|--------|----------------|
|                               | subgroup                      | n        | mean   | 95% CI         | mean        | 95% CI         | mean   | 95% CI         |
| <b>Age</b>                    | Reference: Oldest             | 10,331   | 0.696  | (0.688, 0.705) | 0.287  | (0.276, 0.297) | 0.378  | (0.357, 0.398) | 0.145  | (0.140, 0.149) | 0.723       | (0.714, 0.732) | 0.045  | (0.039, 0.050) |
|                               | 3rd quartile                  | 10,332   | 0.795* | (0.786, 0.804) | 0.178* | (0.107, 0.189) | 0.361  | (0.336, 0.388) | 0.106* | (0.101, 0.110) | 0.784*      | (0.774, 0.793) | 0.015* | (0.011, 0.021) |
|                               | 2nd quartile                  | 10,332   | 0.867* | (0.859, 0.874) | 0.096* | (0.088, 0.103) | 0.419* | (0.390, 0.453) | 0.082* | (0.077, 0.087) | 0.835*      | (0.823, 0.845) | 0.019* | (0.016, 0.024) |
|                               | Youngest                      | 10,332   | 0.949* | (0.945, 0.953) | 0.022* | (0.019, 0.025) | 0.710* | (0.670, 0.753) | 0.036* | (0.033, 0.038) | 0.798*      | (0.775, 0.814) | 0.009* | (0.006, 0.012) |
| <b>Race</b>                   | Reference: non-Hispanic white | 22,072   | 0.814  | (0.808, 0.821) | 0.159  | (0.152, 0.165) | 0.384  | (0.367, 0.399) | 0.092  | (0.089, 0.095) | 0.812       | (0.807, 0.818) | 0.016  | (0.013, 0.019) |
|                               | Asian                         | 1,646    | 0.796  | (0.768, 0.818) | 0.190  | (0.158, 0.221) | 0.276* | (0.196, 0.364) | 0.109  | (0.092, 0.122) | 0.837       | (0.805, 0.865) | 0.038* | (0.019, 0.057) |
|                               | Black or African-American     | 14,428   | 0.865* | (0.860, 0.871) | 0.099* | (0.094, 0.105) | 0.433* | (0.412, 0.457) | 0.080* | (0.077, 0.083) | 0.823*      | (0.813, 0.833) | 0.013  | (0.010, 0.016) |
| <b>Ethnicity</b>              | Reference: non-Hispanic white | 22,072   | 0.814  | (0.808, 0.821) | 0.159  | (0.152, 0.165) | 0.384  | (0.367, 0.399) | 0.092  | (0.089, 0.095) | 0.812       | (0.807, 0.818) | 0.016  | (0.013, 0.019) |
|                               | Hispanic                      | 1,299    | 0.846* | (0.826, 0.867) | 0.092* | (0.073, 0.110) | 0.603* | (0.507, 0.685) | 0.093  | (0.079, 0.106) | 0.813       | (0.787, 0.841) | 0.036* | (0.025, 0.050) |
| <b>Sex assigned at birth</b>  | Reference: male               | 20,511   | 0.824  | (0.819, 0.830) | 0.146  | (0.140, 0.151) | 0.405  | (0.389, 0.422) | 0.089  | (0.086, 0.092) | 0.809       | (0.802, 0.815) | 0.017  | (0.015, 0.020) |
|                               | female                        | 20,816   | 0.854* | (0.849, 0.859) | 0.108* | (0.102, 0.114) | 0.433  | (0.411, 0.452) | 0.085* | (0.082, 0.088) | 0.824*      | (0.816, 0.831) | 0.014  | (0.012, 0.018) |
| <b>Insurance</b>              | Reference: Medicare           | 18,355   | 0.763  | (0.756, 0.769) | 0.204  | (0.198, 0.211) | 0.410  | (0.395, 0.428) | 0.121  | (0.118, 0.124) | 0.759       | (0.752, 0.766) | 0.028  | (0.024, 0.032) |
|                               | Managed care                  | 11,082   | 0.883* | (0.876, 0.891) | 0.095* | (0.087, 0.102) | 0.334* | (0.305, 0.356) | 0.065* | (0.062, 0.069) | 0.858*      | (0.850, 0.866) | 0.014* | (0.011, 0.017) |
|                               | Medicaid                      | 6,676    | 0.917* | (0.901, 0.924) | 0.048* | (0.043, 0.055) | 0.569* | (0.522, 0.611) | 0.052* | (0.049, 0.056) | 0.830*      | (0.815, 0.846) | 0.009* | (0.007, 0.012) |
|                               | Private                       | 3,810    | 0.877* | (0.867, 0.889) | 0.092* | (0.081, 0.102) | 0.417  | (0.365, 0.469) | 0.071* | (0.065, 0.078) | 0.850*      | (0.831, 0.866) | 0.015* | (0.010, 0.021) |
|                               | Missing                       | 1,404    | 0.931* | (0.922, 0.940) | 0.034* | (0.026, 0.042) | 0.594* | (0.520, 0.668) | 0.05*  | (0.043, 0.057) | 0.874*      | (0.850, 0.894) | 0.024  | (0.016, 0.033) |
| <b>Household income</b>       | Reference: Highest            | 10,265   | 0.801  | (0.792, 0.810) | 0.183  | (0.173, 0.192) | 0.312  | (0.285, 0.339) | 0.093  | (0.089, 0.098) | 0.818       | (0.808, 0.827) | 0.017  | (0.013, 0.022) |
|                               | 3rd quartile                  | 10,265   | 0.83*  | (0.822, 0.840) | 0.132* | (0.123, 0.140) | 0.453* | (0.422, 0.485) | 0.092  | (0.088, 0.095) | 0.804       | (0.796, 0.814) | 0.018  | (0.013, 0.022) |
|                               | 2nd quartile                  | 10,265   | 0.835* | (0.827, 0.842) | 0.129* | (0.120, 0.136) | 0.391* | (0.371, 0.417) | 0.096  | (0.092, 0.100) | 0.829       | (0.819, 0.839) | 0.026* | (0.021, 0.031) |
|                               | Lowest                        | 10,266   | 0.854* | (0.846, 0.861) | 0.106* | (0.099, 0.111) | 0.499* | (0.468, 0.527) | 0.082* | (0.078, 0.086) | 0.800*      | (0.789, 0.811) | 0.012* | (0.009, 0.016) |
| <b>Educational attainment</b> | Reference: Highest            | 10,276   | 0.806  | (0.798, 0.817) | 0.176  | (0.165, 0.183) | 0.324  | (0.298, 0.354) | 0.092  | (0.088, 0.096) | 0.828       | (0.819, 0.837) | 0.019  | (0.015, 0.023) |
|                               | 3rd quartile                  | 10,276   | 0.818* | (0.810, 0.826) | 0.146* | (0.136, 0.154) | 0.448* | (0.420, 0.479) | 0.096  | (0.092, 0.100) | 0.791*      | (0.781, 0.801) | 0.022  | (0.017, 0.027) |
|                               | 2nd quartile                  | 10,276   | 0.832* | (0.824, 0.841) | 0.124* | (0.116, 0.132) | 0.434* | (0.406, 0.461) | 0.101* | (0.097, 0.106) | 0.797*      | (0.783, 0.809) | 0.026  | (0.021, 0.031) |
|                               | Lowest                        | 10,276   | 0.867* | (0.859, 0.874) | 0.097* | (0.091, 0.104) | 0.460* | (0.434, 0.487) | 0.074* | (0.070, 0.077) | 0.834       | (0.827, 0.844) | 0.011* | (0.008, 0.014) |

\* indicates that the bootstrapped 95% CI of the subgroup minus reference group difference for each metric does not include zero.

Abbreviations: FPR = false positive rate, FNR = false negative rate, ICI = integrated calibration index. Age quartiles comprised: youngest (18.1 – 47.8 years) 2<sup>nd</sup> quartile (47.8 – 60.8 years), 3<sup>rd</sup> quartile (60.8 – 71.2 years) and oldest (71.2 – ≥90 years). Zip code level median household income

quartiles comprised: lowest quartile (\$11,269 - \$33,117) 2<sup>nd</sup> quartile (\$33,117 - \$58,784) 3<sup>rd</sup> quartile (\$58,784 - \$80,363) and highest quartile (\$80,363 - \$225,598). Zip code level educational attainment (proportion of residents >= 25 years old who completed at least a bachelor's degree, inclusive of all higher levels) quartiles comprised: lowest quartile (0% - 21.9%), 2<sup>nd</sup> quartile (21.9% - 28.6%), 3<sup>rd</sup> quartile (28.6% - 48.7%), and highest quartile (48.8% - 100%).

**Appendix Table 3: Model predictive performance for entire test cohort, threshold for triggered palliative care consultation set at predicted probability of 6 month mortality = 0.3**

|             |        | accuracy |                | FPR   |                | FNR   |                | Brier |                | C-statistic |                | ICI   |                |
|-------------|--------|----------|----------------|-------|----------------|-------|----------------|-------|----------------|-------------|----------------|-------|----------------|
| group       | n      | mean     | 95% CI         | mean  | 95% CI         | mean  | 95% CI         | mean  | 95% CI         | mean        | 95% CI         | mean  | 95% CI         |
| Test cohort | 41,327 | 0.839    | (0.835, 0.844) | 0.128 | (0.123, 0.131) | 0.419 | (0.406, 0.435) | 0.087 | (0.085, 0.089) | 0.816       | (0.811, 0.821) | 0.014 | (0.012, 0.015) |

Abbreviations: FPR = false positive rate, FNR = false negative rate, ICI = integrated calibration index. Age quartiles comprised: youngest (18.1 – 47.8 years) 2<sup>nd</sup> quartile (47.8 – 60.8 years), 3<sup>rd</sup> quartile (60.8 – 71.2 years) and oldest (71.2 – ≥90 years). Zip code level median household income quartiles comprised: lowest quartile (\$11,269 - \$33,117) 2<sup>nd</sup> quartile (\$33,117 - \$58,784) 3<sup>rd</sup> quartile (\$58,784 - \$80,363) and highest quartile (\$80,363 - \$225,598). Zip code level educational attainment (proportion of residents >= 25 years old who completed at least a bachelor’s degree, inclusive of all higher levels) quartiles comprised: lowest quartile (0% - 21.9%), 2<sup>nd</sup> quartile (21.9% - 28.6%), 3<sup>rd</sup> quartile (28.6% - 48.7%), and highest quartile (48.8% - 100%).

**Appendix Table 4: Model predictive performance for each patient subgroup, threshold for triggered palliative care consultation set at predicted probability of 6 month mortality = 0.5**

|                        |                               | accuracy |        |                | FPR    |                | FNR    |                | Brier  |                | C-statistic |                | ICI    |                |
|------------------------|-------------------------------|----------|--------|----------------|--------|----------------|--------|----------------|--------|----------------|-------------|----------------|--------|----------------|
|                        |                               | n        | mean   | 95% CI         | mean        | 95% CI         | mean   | 95% CI         |
| Age                    | Reference: Oldest             | 10,331   | 0.780  | (0.771, 0.788) | 0.121  | (0.113, 0.130) | 0.659  | (0.637, 0.682) | 0.144  | (0.140, 0.149) | 0.722       | (0.713, 0.731) | 0.045  | (0.039, 0.050) |
|                        | 3rd quartile                  | 10,332   | 0.846* | (0.838, 0.854) | 0.069* | (0.062, 0.075) | 0.651  | (0.627, 0.679) | 0.105* | (0.101, 0.110) | 0.784*      | (0.773, 0.794) | 0.015* | (0.010, 0.019) |
|                        | 2nd quartile                  | 10,332   | 0.890* | (0.882, 0.896) | 0.042* | (0.037, 0.047) | 0.645  | (0.615, 0.678) | 0.082* | (0.077, 0.086) | 0.834*      | (0.823, 0.844) | 0.019* | (0.015, 0.024) |
|                        | Youngest                      | 10,332   | 0.961* | (0.957, 0.964) | 0.002* | (0.001, 0.003) | 0.891* | (0.863, 0.916) | 0.036* | (0.033, 0.038) | 0.797*      | (0.777, 0.815) | 0.009* | (0.007, 0.012) |
| Race                   | Reference: non-Hispanic white | 22,072   | 0.861  | (0.856, 0.866) | 0.068  | (0.064, 0.073) | 0.654  | (0.635, 0.675) | 0.092  | (0.089, 0.095) | 0.812       | (0.806, 0.819) | 0.016  | (0.013, 0.019) |
|                        | Asian                         | 1,646    | 0.850  | (0.819, 0.873) | 0.084  | (0.064, 0.108) | 0.473* | (0.376, 0.569) | 0.109* | (0.094, 0.123) | 0.837       | (0.806, 0.861) | 0.039* | (0.020, 0.057) |
|                        | Black or African-American     | 14,428   | 0.894* | (0.889, 0.899) | 0.036* | (0.033, 0.040) | 0.695* | (0.670, 0.719) | 0.080* | (0.077, 0.083) | 0.823*      | (0.813, 0.832) | 0.013  | (0.010, 0.016) |
| Ethnicity              | Reference: non-Hispanic white | 22,072   | 0.861  | (0.856, 0.866) | 0.068  | (0.064, 0.073) | 0.654  | (0.635, 0.675) | 0.092  | (0.089, 0.095) | 0.812       | (0.806, 0.819) | 0.016  | (0.013, 0.019) |
|                        | Hispanic                      | 1,299    | 0.892* | (0.875, 0.910) | 0.009* | (0.005, 0.016) | 0.813* | (0.739, 0.882) | 0.093  | (0.080, 0.107) | 0.813       | (0.787, 0.836) | 0.037* | (0.024, 0.050) |
| Sex assigned at birth  | Reference: male               | 20,511   | 0.872  | (0.867, 0.877) | 0.059  | (0.055, 0.064) | 0.658  | (0.637, 0.676) | 0.089  | (0.086, 0.092) | 0.809       | (0.802, 0.815) | 0.017  | (0.015, 0.020) |
|                        | female                        | 20,816   | 0.883* | (0.879, 0.888) | 0.041* | (0.038, 0.045) | 0.699* | (0.677, 0.721) | 0.084* | (0.082, 0.087) | 0.824*      | (0.816, 0.831) | 0.014  | (0.011, 0.018) |
| Insurance              | Reference: Medicare           | 18,355   | 0.827  | (0.820, 0.832) | 0.080  | (0.075, 0.085) | 0.668  | (0.649, 0.687) | 0.121  | (0.117, 0.124) | 0.758       | (0.750, 0.766) | 0.028  | (0.024, 0.032) |
|                        | Managed care                  | 11,082   | 0.916* | (0.910, 0.922) | 0.029* | (0.025, 0.033) | 0.640  | (0.610, 0.670) | 0.065* | (0.062, 0.069) | 0.858*      | (0.849, 0.867) | 0.014* | (0.012, 0.017) |
|                        | Medicaid                      | 6,676    | 0.928* | (0.922, 0.934) | 0.021* | (0.017, 0.025) | 0.780* | (0.743, 0.813) | 0.052* | (0.049, 0.056) | 0.830*      | (0.815, 0.845) | 0.009* | (0.006, 0.012) |
|                        | Private                       | 3,810    | 0.882* | (0.871, 0.893) | 0.062* | (0.052, 0.073) | 0.650  | (0.598, 0.707) | 0.071* | (0.065, 0.077) | 0.849*      | (0.832, 0.865) | 0.015* | (0.010, 0.020) |
|                        | Missing                       | 1,404    | 0.933* | (0.923, 0.943) | 0.017* | (0.010, 0.024) | 0.809* | (0.751, 0.868) | 0.050* | (0.042, 0.057) | 0.874*      | (0.849, 0.896) | 0.024  | (0.016, 0.034) |
| Household income       | Reference: Highest            | 10,265   | 0.856  | (0.848, 0.864) | 0.076  | (0.068, 0.083) | 0.629  | (0.599, 0.662) | 0.093  | (0.089, 0.098) | 0.817       | (0.808, 0.827) | 0.017  | (0.014, 0.022) |
|                        | 3rd quartile                  | 10,265   | 0.863  | (0.856, 0.870) | 0.058* | (0.051, 0.064) | 0.723* | (0.694, 0.747) | 0.092  | (0.088, 0.096) | 0.803       | (0.794, 0.813) | 0.018  | (0.014, 0.023) |
|                        | 2nd quartile                  | 10,265   | 0.878* | (0.871, 0.885) | 0.045* | (0.040, 0.051) | 0.605  | (0.572, 0.639) | 0.096  | (0.092, 0.101) | 0.829       | (0.819, 0.839) | 0.025* | (0.019, 0.031) |
|                        | Lowest                        | 10,266   | 0.887* | (0.881, 0.894) | 0.040* | (0.036, 0.045) | 0.752* | (0.730, 0.774) | 0.082* | (0.078, 0.085) | 0.800*      | (0.789, 0.810) | 0.012* | (0.009, 0.016) |
| Educational attainment | Reference: Highest            | 10,276   | 0.856  | (0.848, 0.864) | 0.073  | (0.066, 0.080) | 0.649  | (0.620, 0.679) | 0.092  | (0.087, 0.096) | 0.827       | (0.819, 0.836) | 0.020  | (0.016, 0.024) |
|                        | 3rd quartile                  | 10,276   | 0.860  | (0.853, 0.868) | 0.065  | (0.059, 0.071) | 0.695* | (0.669, 0.721) | 0.095  | (0.091, 0.099) | 0.790*      | (0.781, 0.800) | 0.022  | (0.017, 0.027) |
|                        | 2nd quartile                  | 10,276   | 0.867* | (0.860, 0.874) | 0.050* | (0.045, 0.056) | 0.644  | (0.614, 0.673) | 0.101* | (0.097, 0.106) | 0.797*      | (0.784, 0.809) | 0.026  | (0.021, 0.032) |
|                        | Lowest                        | 10,276   | 0.902* | (0.896, 0.908) | 0.030* | (0.026, 0.033) | 0.731* | (0.703, 0.758) | 0.073* | (0.070, 0.077) | 0.834       | (0.824, 0.843) | 0.011* | (0.008, 0.014) |



\* indicates that the bootstrapped 95% CI of the subgroup minus reference group difference for each metric does not include zero.

Abbreviations: FPR = false positive rate, FNR = false negative rate, ICI = integrated calibration index. Age quartiles comprised: youngest (18.1 – 47.8 years) 2<sup>nd</sup> quartile (47.8 – 60.8 years), 3<sup>rd</sup> quartile (60.8 – 71.2 years) and oldest (71.2 – ≥90 years). Zip code level median household income quartiles comprised: lowest quartile (\$11,269 - \$33,117) 2<sup>nd</sup> quartile (\$33,117 - \$58,784) 3<sup>rd</sup> quartile (\$58,784 - \$80,363) and highest quartile (\$80,363 - \$225,598). Zip code level educational attainment (proportion of residents ≥ 25 years old who completed at least a bachelor's degree, inclusive of all higher levels) quartiles comprised: lowest quartile (0% - 21.9%), 2<sup>nd</sup> quartile (21.9% - 28.6%), 3<sup>rd</sup> quartile (28.6% - 48.7%), and highest quartile (48.8% - 100%).

**Appendix Figure 2: Original mortality risk model predictor coefficients versus the standardized mean difference in predictors, reference group minus subgroup, by age quartile**

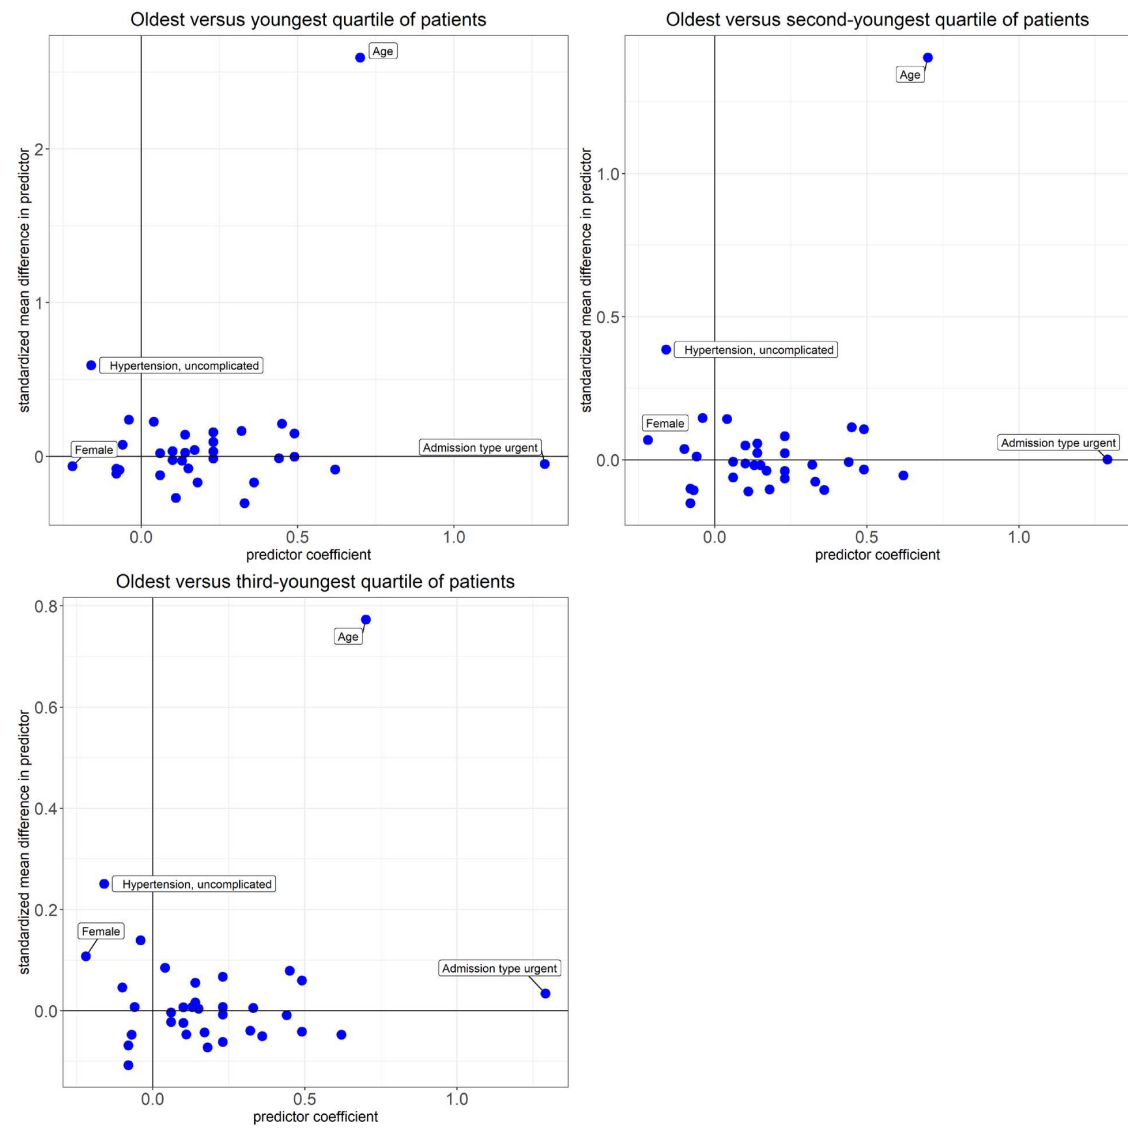

All 34 predictors included in the original EHR-based mortality risk model are represented in this plot. Variable coefficient estimates are represented on the x-axis; standardized mean difference (difference between the two group means divided by the standard deviation of the variable) is represented on the y-axis.

Appendix Figure 3: Original mortality risk model predictor coefficients versus the standardized mean difference in predictors, reference group minus subgroup, by ethnicity

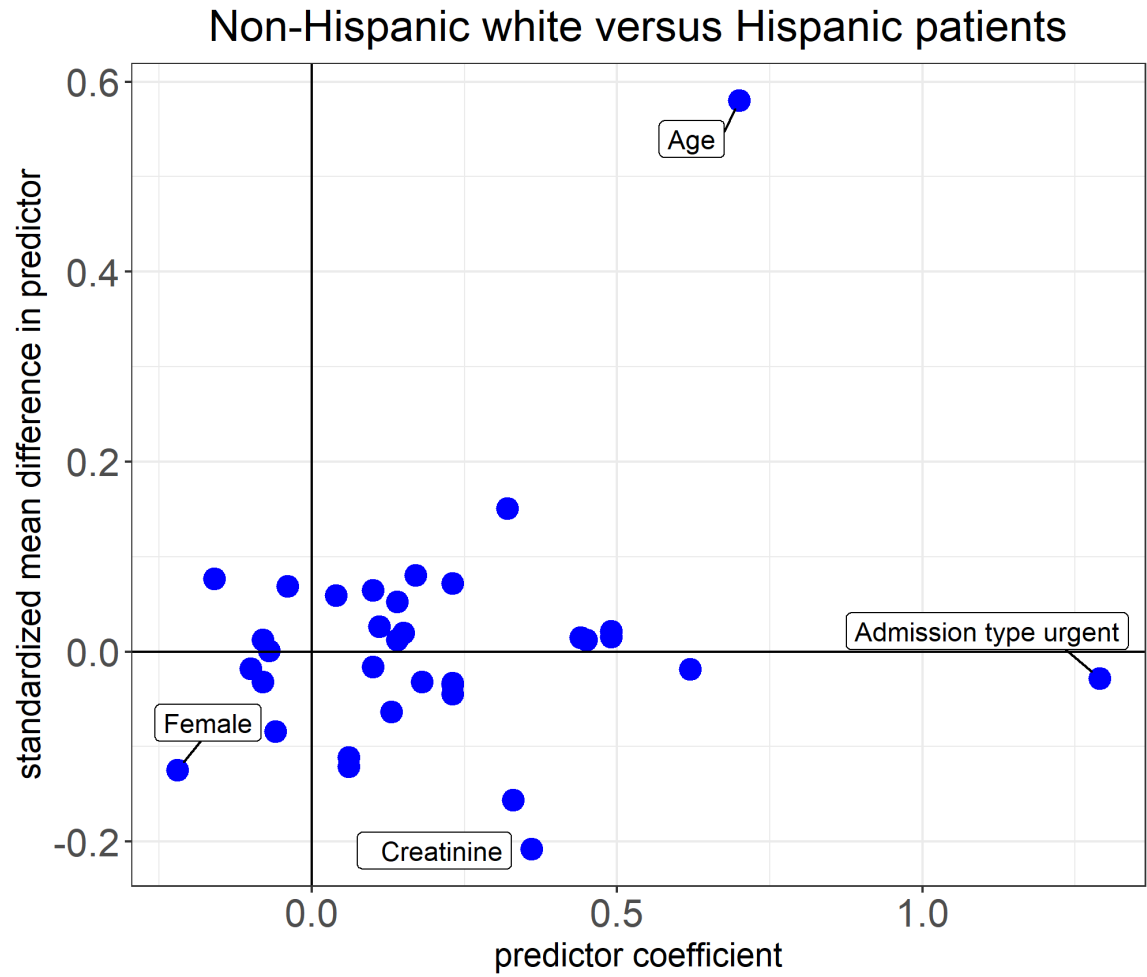

**Appendix Figure 4: Original mortality risk model predictor coefficients versus the standardized mean difference in predictors, reference group minus subgroup, by insurance status**

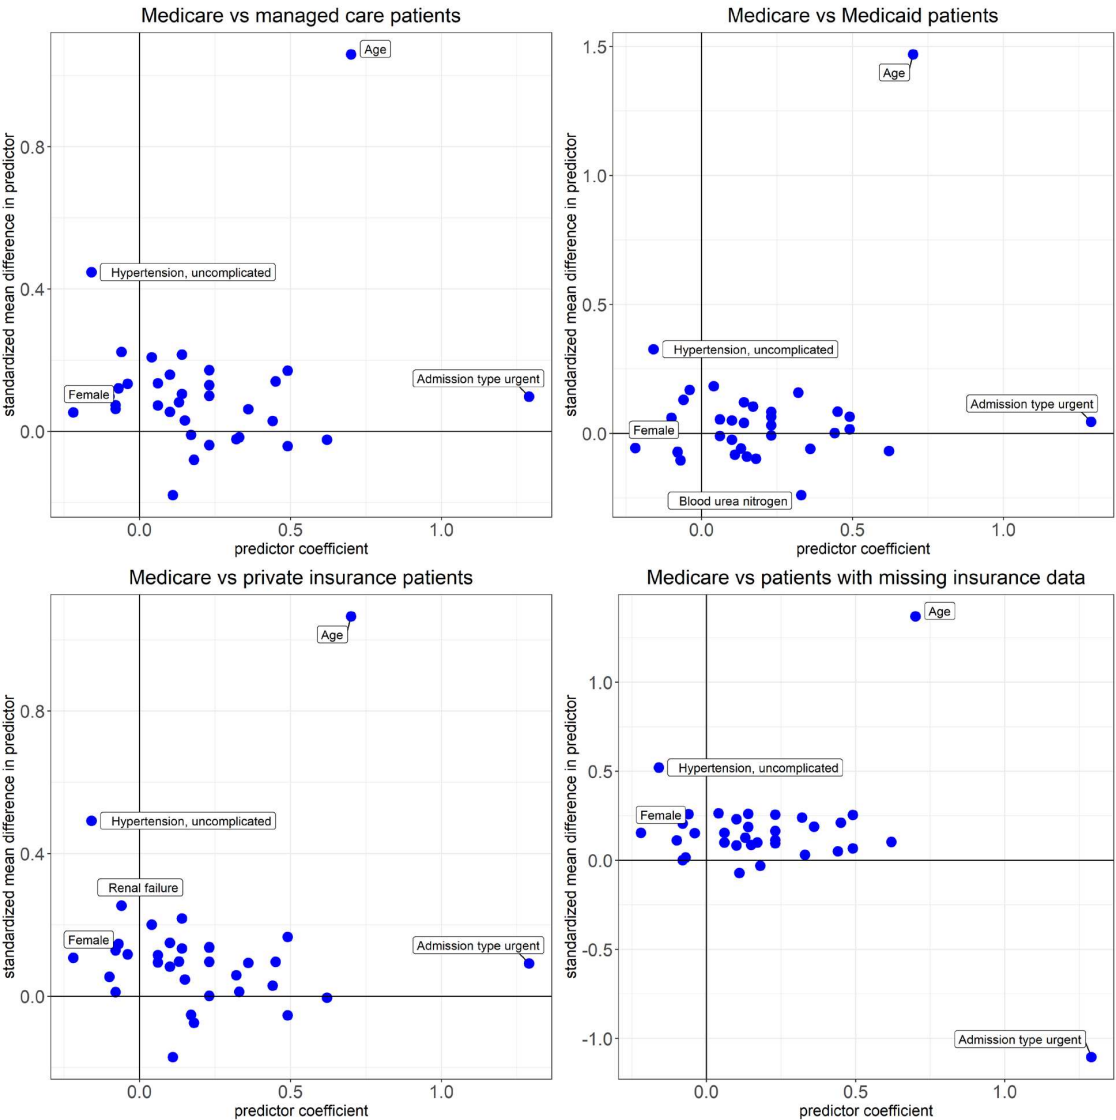

**Appendix Figure 5: Original mortality risk model predictor coefficients versus the standardized mean difference in predictors, reference group minus subgroup, by household income quartile**



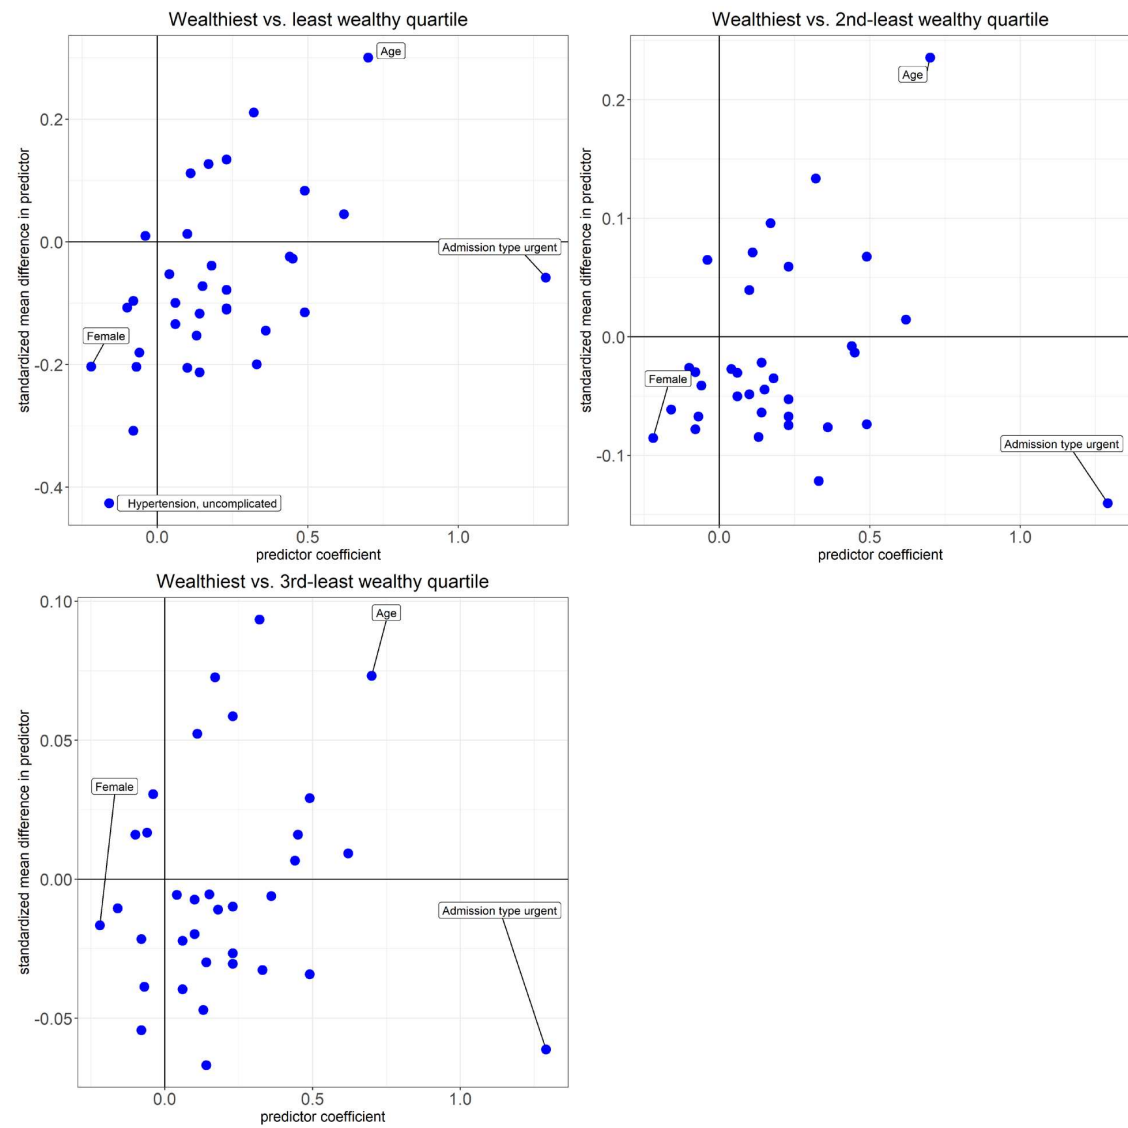

**Appendix Figure 6: Original mortality risk model predictor coefficients versus the standardized mean difference in predictors, reference group minus subgroup, by educational attainment quartile**

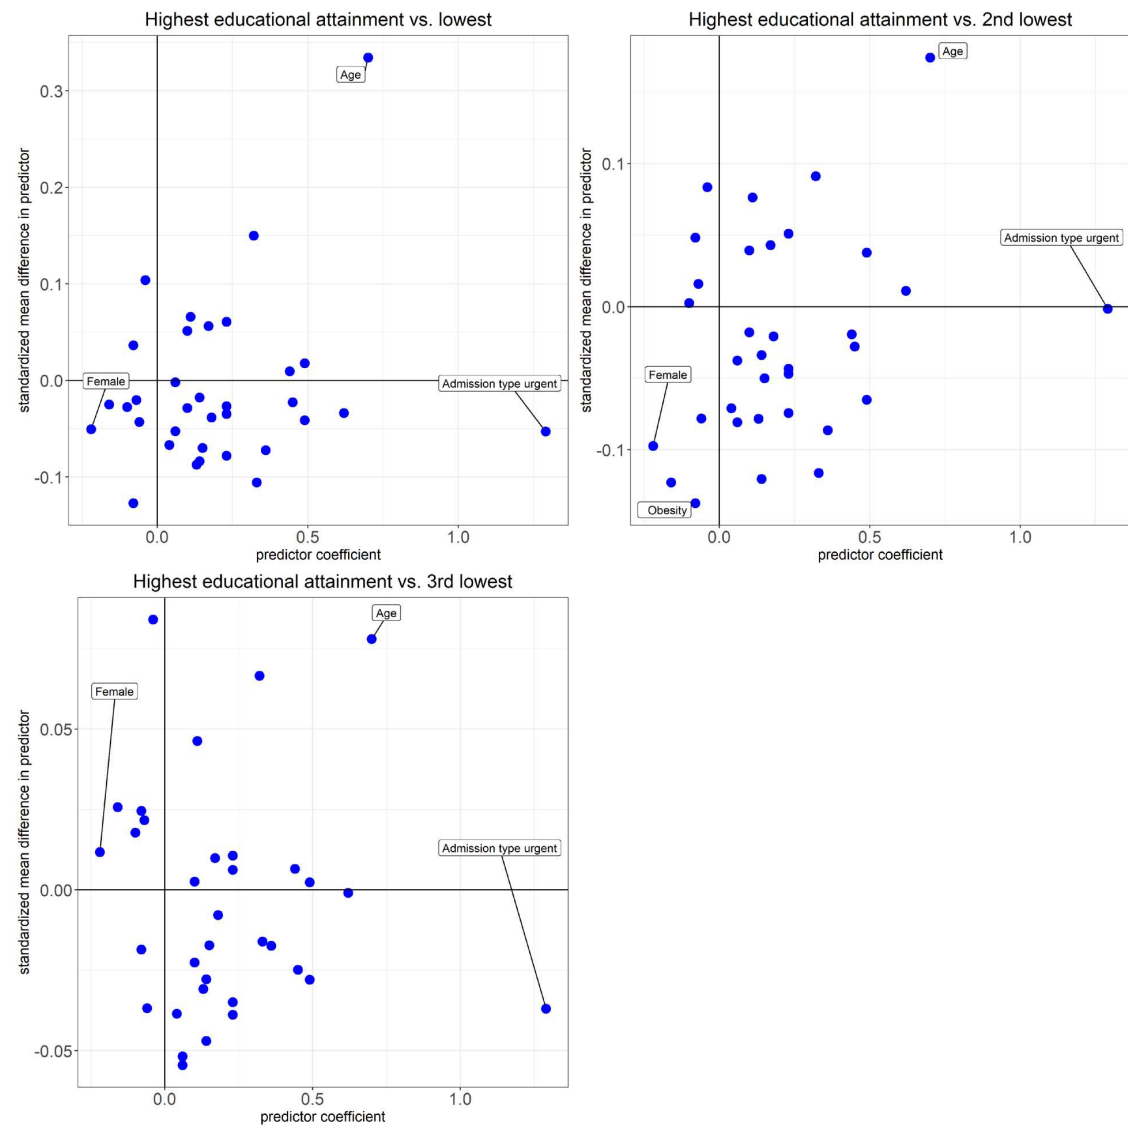

Supplement: inline-supplementary-material-1 [file inline-supplementary-material-1.pdf]
